# Supplementary material for: DNA-templated combinatorial assembly of small molecule fragments amenable to selection/amplification cycles
Source: Royal Society of Chemistry journal article supplement (doi:10.1039/c0sc00574f), 2011-01-01
Supplement: c0sc00574f.pdf [file c0sc00574f.pdf]

DNA-Templated Combinatorial Assembly of Small Molecule  
Fragments Amenable to Selection/Amplification Cycles.

Jean Pierre Daguer, Mihai Ciobanu, Susana Alvarez, Sofia  
Barluenga, Nicolas Winssinger\*

*Institut de Science et Ingénierie Supramoléculaires (ISIS – UMR 7006)*  
*Université de Strasbourg - CNRS*  
*8 allée Gaspard Monge, F67000 Strasbourg, France*  
*Fax: (+) 33 368855112*  
*E-mail: winssinger@unistra.fr*

**Electronic Supplementary Information**

*DNA-templated combinatorial libraries.* A library of DNA containing all permutation of codons complementary to the PNA libraries flanked by 20-mer primer was obtained by split and pool synthesis from commercial supplier on 1  $\mu$ mol scale (Microsynth AG, Switzerland) and purified by PAGE. The DNA-templated combinatorial library of drug fragments was prepared by mixing the PNA libraries (N-terminus library and C-terminus library) with the DNA library as well as sequences complementary to the primers on the DNA library (P5' block 5'-ACGAGAGGCTCACAACAGGC-3' and P3' block, 5'-GGATAGACAATAACGACGAC-3'). All the component were mixed at equal molar ratio to obtain a final concentration of 600 nM in 50 mM, Tris -SO<sub>4</sub> buffer, pH 8.7 or alternatively PBS buffer, NaCl, 0.2 M, in a final volume of 100  $\mu$ L. The mixture was heat denatured (10 min at 95 °C) and then allowed to cool to room temperature over the course of one hour.

*Screening of carbonic anhydrase.* Carbonic anhydrase (CA) (Sigma) was dissolved in PBS at 2 mg/ml and immobilized on carboxylic acid activated magnetic beads (Dynal Invitrogen) following the manufacturer recommendations. 10  $\mu$ L of beads immobilized CA were used at each round of selection. The DNA/PNA hybrids solution (600 nM, 10  $\mu$ L) was incubated with the target immobilized protein slurry (10  $\mu$ L) in an Eppendorf tube for 30 min at RT with gentle agitation. After incubation the tube was placed on a magnetic stand for 2 minutes to pellet the beads along the wall and the supernatant containing the non bound molecules was pipetted off and discarded. The beads were washed 10 times with PBS-Tween 20, 0.1% (PBS-T) 100  $\mu$ L, to eliminate PNA/DNA hybrids non specifically interacting with the target. After 10 washes, the magnetic beads were resuspended in 50  $\mu$ L of distilled water and heated at 94°C for 10 min. The beads were magnetically pelleted and the supernatant was recovered in a new tube, diluted 100 fold and 1  $\mu$ L of this dilution was used for the PCR reaction. The same procedure was carried out in parallel with BSA functionalized magnetic beads to identify specific selection corresponding to carbonic anhydrase by comparison of the selected compounds. PCR amplification was carried out as follows: 2 $\mu$ M primer P3' Cy3-5'-GGATAGACAATAACGACGAC-3', 2 $\mu$ M primer P5' Biot-5'-GCCTGTTGTGAGCCTCTCGT-3', 0.2 units of AmpliTaq Gold (Applied Biosystems), 1.5 mM MgCl<sub>2</sub>, Amplitaq Gold Buffer II, one first incubation at 95°C for 10 min, 95°C during 1 min, 52°C for 30s, 68°C for 30 s (25 cycles) and a final elongation for 10 min at 72°C. The PCR reactions were analyzed on 3.5% agarose electrophoresis to confirm the amplification of a specific 68 nucleotides product, stained with ethidium bromide and visualized by UV transillumination. 100  $\mu$ l of PCR reaction from each round of selection were purified using Quiaquick PCR purification kit (Qiagen). The purified PCR product was immobilized on Dynal Streptavidine magnetic beads, and single strand DNA was prepared following a known protocol.(34) The Cy3 labeled DNA strand (ss-FDNA) was conserved at -20°C until hybridization on microarray slides while the immobilized biotinylated strand (template strand) was rehybridized with a molar excess of the PNA libraries and the complementary sequence to the primers (600 nM, 200  $\mu$ l) during 30 min at 50°C. The non hybridized PNA molecules were washed out of the magnetic beads by five successive washes with 100  $\mu$ l PBS-T at room temperature. This DNA-PNA adducts corresponding to the selected library members were eluted from the magnetic beads by heating the beads at 95°C (10  $\mu$ l) for ten minutes on PBS buffer, 5 mM biotin. The eluted DNA/PNA hybrids were engaged in further rounds of selection with immobilized carbonic anhydrase following the same protocol as described above.

The Cy3 labeled DNA strands corresponding to four rounds of selection were hybridized to custom array containing the complementary sequences at 35 °C as previously described.<sup>(23)</sup> The results from the fourth round of sequencing were also sequenced using TOPO TA cloning systems (Invitrogen™) following the manufacturer's protocol and sequenced by GATC Biotech AG sequencing services

*Affinity of covalent adducts.* The affinities were measured using a microcalorimetric ITC 200 (Microcal). A 500 μM solution of ligand in Tris-SO<sub>4</sub>, 50 mM buffer, pH 8.5, 2% DMSO was titrated with a 25 μM solution of Carbonic anhydrase (Sigma) in the same buffer at 25 °C. The isothermal titration curves obtained were treated and fitted using Origin 7 software (OriginLab).

### **General Techniques for chemical synthesis.**

All reactions were carried out under a nitrogen atmosphere with dry solvents under anhydrous conditions, unless otherwise noted. Anhydrous solvents were obtained by passing them through commercially available alumina column (Innovative Technology, Inc., ® VA). NovaPEG Rink Amide Resin resin was purchased from Novabiochem®, and was swollen in DCM before each reaction. Solid phase reactions were carried in SPE tubes fitted with a frit and a tap. Automated solid phase synthesis was carried out on an Intavis Multipеп instrument ([http://www.intavis.com/en/Automated\\_Peptide\\_Synthesis/MultiPep\\_RS/index.php](http://www.intavis.com/en/Automated_Peptide_Synthesis/MultiPep_RS/index.php)).

LC-MS were recorded using an HP 1100 series or Thermo Electron Corporation HPLC with a Thermo Finnigan Surveyor MSQ Mass Spectrometer System. A Thermo Scientific column (50 x 2.1 mm) was used. MALDI spectra were measured using a Bruker Daltonics AutoflexII TOF/TOF spectrometer. Polymer-bound intermediates were characterized by LC-MS and/or MALDI (2,5-Dihydroxybenzoic acid or α-Cyano-4-hydroxycinnamic acid matrix and desorbed with laser between 35-55%) following a cleavage from the resin. Cleavages were carried out on 0.1-0.3 mg of dry resin with 20 μL of TFA for 20 min at room temperature. The TFA solution was either evaporated or added to 200 μL of Et<sub>2</sub>O and centrifuged at 18000g for 5 min to pellet the precipitated compound. The resulting white pellet was then washed with Et<sub>2</sub>O (200 μL) and redissolved in 1:1 MeCN:H<sub>2</sub>O (40μL) for analysis. The mix and split synthesis was performed according to previously established protocols (F. Debaene, J. DaSilva, Z. Pianowski, F. Duran, N. Winssinger *Tetrahedron* **2007**, 63, 6577-6586).

## General procedures for the synthesis of PNA-encoded libraries

**Procedure 1. General procedure for capping the resin.** To 100 mg of NovaPEG Rink amide resin were added 2.0 mL of capping mixture (9.2 mL of acetic anhydride and 13 mL of 2,6 lutidine in 188 mL of DMF), and the resin was shaken for 15 min. Subsequently, the resin was washed with 6 x 2 mL of DMF and 6 x 2 mL of CH<sub>2</sub>Cl<sub>2</sub>.

**Procedure 2. General procedure for capping in Intavis AG Multipeg RS Synthesizer.** To 10 mg of NovaPEG Rink amide resin were added 100 µL of capping mixture (9.2 mL of acetic anhydride and 13 mL of 2,6 lutidine in 188 mL of DMF). After 5 min, the resin was washed with 2 x 250 µL of DMF.

**Procedure 3. General procedure for Fmoc deprotection.** To 100 mg of NovaPEG Rink amide resin were added 2.0 mL of 20% piperidine solution in DMF, and the resin was shaken for 5 min. Subsequently, the resin was washed with 6 x 2 mL of DMF and 6 x 2 mL of CH<sub>2</sub>Cl<sub>2</sub>, and the deprotection sequence was repeated a second time.

**Procedure 4. General procedure for Fmoc deprotection in Intavis AG Multipeg RS Synthesizer.** To 10 mg of NovaPEG Rink amide resin were added 100 µL of 20% piperidine solution in DMF. After 2 min, the resin was washed with 250 µL DMF and the sequence was repeated a second time. Finally, the resin was washed with 5 x 250 µL of DMF and 3 x 250 µL of CH<sub>2</sub>Cl<sub>2</sub>.

**Procedure 5. First Lysine coupling on resin, loading reduction.** To a solution of 56.2 mg (0.09 mmol, 1.0 equiv, 0.2 mmol/g loading) of Fmoc-Lys(Mtt)-OH in 7.0 mL of NMP were added 68.9 mg (0.45 mmol, 5 equiv) of HOBt followed by 210 µL of DIC. The mixture was stirred for 5 min at room temperature, and then added to 450 mg of NovaPEG Rink amide resin. The reaction mixture was shaken for 16 hours and subsequently the resin was washed with 6 x 10 mL of DMF and 6 x 10 mL of CH<sub>2</sub>Cl<sub>2</sub>.

**Procedure 6. PEG- spacer coupling.** To a solution of Fmoc protected-PEG spacer (4.0 equiv) in NMP (60 mM) were added (3.5 equiv) of HCTU (0.5M) in NMP followed by base solution [DIPEA 1.2 M (0.25 mmol, 4 equiv) and 2,6 lutidine 1.8M (0.38 mmol, 6.0 equiv) in NMP]. The mixture was stirred for 5 min at room temperature, and then added to the pre-swollen resin. The reaction mixture was shaken for 16 hours and subsequently the resin was washed with 6 x DMF and 6 x CH<sub>2</sub>Cl<sub>2</sub>. Finally, the resin was capped (*procedure 1*) and Fmoc was deprotected (*procedure 3*).

**Procedure 7. General procedure for amino acid coupling to resin in Intavis AG Multipeg RS Synthesizer** To a solution of 8.0 µmol (4.0 equiv) of Fmoc protected aminoacid in 40 µL of NMP were added 14 µL (7.0 µmol, 3.5 equiv) of HCTU 0.5 M in NMP, followed by 6.7 µL of base solution [DIPEA 1.2 M (0.008 mmol, 4.0 equiv ) and 2,6 lutidine 1.8 M (0.012 mmol, 6.0 equiv ) in NMP]. The mixture was then added to 10 mg (2.0 µmol, 1.0 equiv) of the corresponding resin. After 20 min the resin was filtered and washed with DMF and the sequence was repeated. The resin was then filtered and washed with 6 x 250 µL of DMF and 6 x 250 µL of CH<sub>2</sub>Cl<sub>2</sub>. Finally, the resin was capped (*procedure 2*) and Fmoc was deprotected according to *procedure 4*.

**Procedure 8. General procedure for the azide generation.** To a solution of 294 mg (1.4 mmol, 11 equiv) imidazole-1-sulfonyl azide hydrochloride (E.D. Goddard-Borger, R.V. Stick Org. Lett. 2007, 9(19), 3797-3800) in 12.6 mL of MeOH were added successively 305 mg (2.2 mmol, 18 equiv) K<sub>2</sub>CO<sub>3</sub> and 8.0 mg (0.05 mmol, 0.35 equiv) anhydrous CuSO<sub>4</sub> and the resulting solution was sonicated for 20 min. To 10 mg (2.0 µmol, 1.0 equiv) of the corresponding resin were added 250 µL of the previously prepared

solution. After 16 hours, the resin was washed with 6 x 250  $\mu\text{L}$  of sodium diethyl dithiocarbamate 0.02 M in DMF, 6 x 250  $\mu\text{L}$  of DMF, 6 x MeOH and 6 x  $\text{CH}_2\text{Cl}_2$ , and the sequence was repeated again.

**Procedure 9. Mtt deprotection on NovaPEG resin in Intavis AG Multipeg RS Synthesizer.** To 10 mg of resin (0.2 mmol, 1.0 equiv) were added 250  $\mu\text{L}$  of 50% hexafluoroisopropanol in DCE. After, the resin was washed with 2 x 250  $\mu\text{L}$   $\text{CH}_2\text{Cl}_2$  and 4 x 250  $\mu\text{L}$  of DMF. This procedure was repeated 9 times during 1 hour.

**Procedure 10. General procedure for PNA synthesis on NovaPEG resin in Intavis AG Multipeg RS Synthesizer.** To a solution of 8.0  $\mu\text{mol}$  (4.0 equiv) of the corresponding Fmoc or Mtt -protected PNA monomer (the nucleobases are Boc protected - S. Pothukanuri, Z. Pianowski, N. Winssinger, *Eur. J. Org. Chem.*, **2008**, *18*, 3141-48) in 40  $\mu\text{L}$  of NMP were added 14  $\mu\text{L}$  (7.0  $\mu\text{mol}$ , 3.5 equiv) of HCTU 0.5M in NMP, followed by 6.7  $\mu\text{L}$  of base solution [DIPEA 1.2 M (0.008 mmol, 4.0 equiv) and 2,6 lutidine 1.8M (0.012 mmol, 6.0 equiv) in NMP]. The mixture was then added to 10 mg of the corresponding resin. After 20 min the resin was filtered and washed with DMF and the sequence was repeated, then, the resin was washed with 6 x 100  $\mu\text{L}$  of DMF and 6 x 100  $\mu\text{L}$  of  $\text{CH}_2\text{Cl}_2$ . Finally, the resin was capped (**procedure 2**) and Fmoc was deprotected according to **procedure 4**.

**Procedure 11. General procedure for cleavage of compounds from the resin.** The resin was treated with TFA for 4 hours. The TFA solution was precipitated in  $\text{Et}_2\text{O}$  (10 times TFA volume) and centrifuged to recover the product as a pellet. The precipitate was re-dissolved in  $\text{H}_2\text{O}$  (500  $\mu\text{L}$  for crude cleaved from 10 mg of resin) then lyophilized.

**Procedure 12. General procedure for Click cycloaddition reaction on NovaPEG resin in Intavis AG Multipeg RS Synthesizer.** To the corresponding resin (11.5 mg) were added successively 173  $\mu\text{L}$  (0.0173 mmol, 7.5 equiv) of alkyne 0.1M in NMP, 17.3  $\mu\text{L}$  (17.2  $\mu\text{mol}$ , 7.5 equiv) of sodium ascorbate 198 mg/mL in  $\text{H}_2\text{O}$ , 4.4  $\mu\text{L}$  (0.57  $\mu\text{mol}$ , 0.25 equiv) of copper sulfate 21.4 mg/mL in  $\text{H}_2\text{O}$  and 44  $\mu\text{L}$  (1.1 mmol, 0.5 equiv of TBTA). After 16 hours, the resin was washed with 6 x 250  $\mu\text{L}$  of sodium diethyl dithiocarbamate 0.02 M in DMF, 6 x 250  $\mu\text{L}$  of DMF, 6 x MeOH and 6 x  $\text{CH}_2\text{Cl}_2$  (V. V. Rostovtsev, L. G. Green, V. V. Fokin and K. B. Sharpless, *Angew. Chem. Int. Ed. Engl.*, **2002**, *41*, 2596-2599; C. W. Tornøe, C. Christensen and M. Meldal, *J. Org. Chem.*, 2002, **67**, 3057-3064; N.G. Angelo, P.S. Arora, *J. Org. Chem.* 2007, *72*, 7963-7967)

**Procedure 13. General procedure for the loading of the flavones.** The resin was swollen in  $\text{CH}_2\text{Cl}_2$  for 20 min and treated with a premixed (30 min) solution of the corresponding flavon (5.0 equiv), HOBt (5.0 equiv), DIC (15 equiv) in NMP during 5 hours. Then the resin was filtered and washed with DMF and  $\text{CH}_2\text{Cl}_2$ .

**Procedure 14. General procedure for the reactions with hydrazine or amidinium salt.** The resin (1.0 equiv) was treated with a premixed solution of the corresponding hydrazine or amidinium salt (3.0 equiv) and an aqueous solution of  $\text{NaHCO}_3$  (3M, 4.0 equiv) in *n*BuOH (0.5 mL), and then was shaken at 50  $^\circ\text{C}$  for 18 hours. The mixture was filtered and washed sequentially with DMF and  $\text{CH}_2\text{Cl}_2$ .

**Procedure 15. General procedure for the reduction of the azide.** The resin (10 mg, 2  $\mu\text{mol}$ , 1.0 equiv) was treated with a 1M solution of  $\text{PMe}_3$  (3.0 equiv, THF) in THF (200  $\mu\text{L}$ ) for 5 min. After,  $\text{H}_2\text{O}$  (200  $\mu\text{L}$ ) was added and the reaction was shaken for 8 hours. The resin was washed with THF,  $\text{H}_2\text{O}$  and finally with DMF and  $\text{CH}_2\text{Cl}_2$ .

## PNA-encoded heterocycles libraries, general scheme.

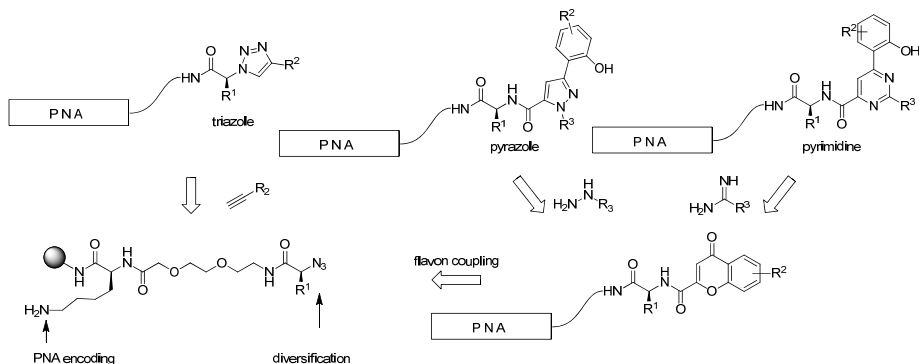

## PNA-encoded heterocycles libraries, detail synthesis.

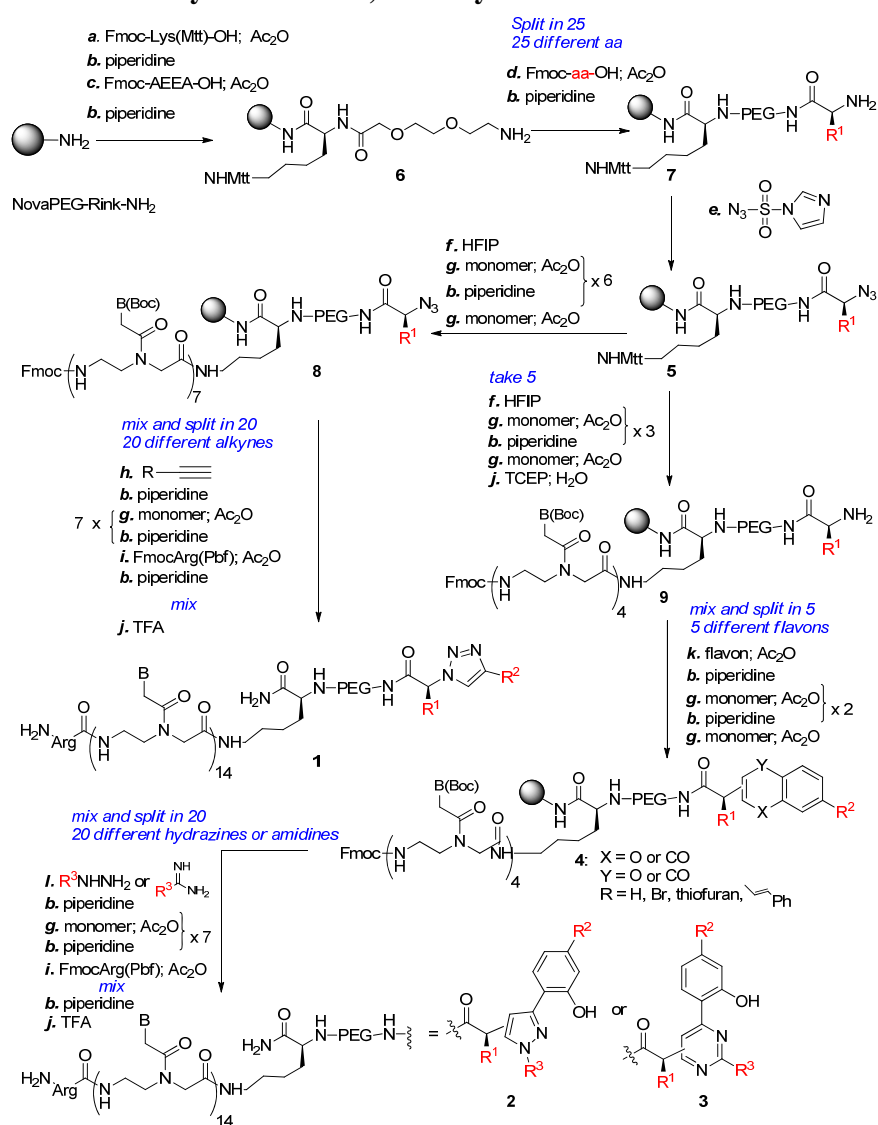

**1.- Validation of the triazole library synthesis.**

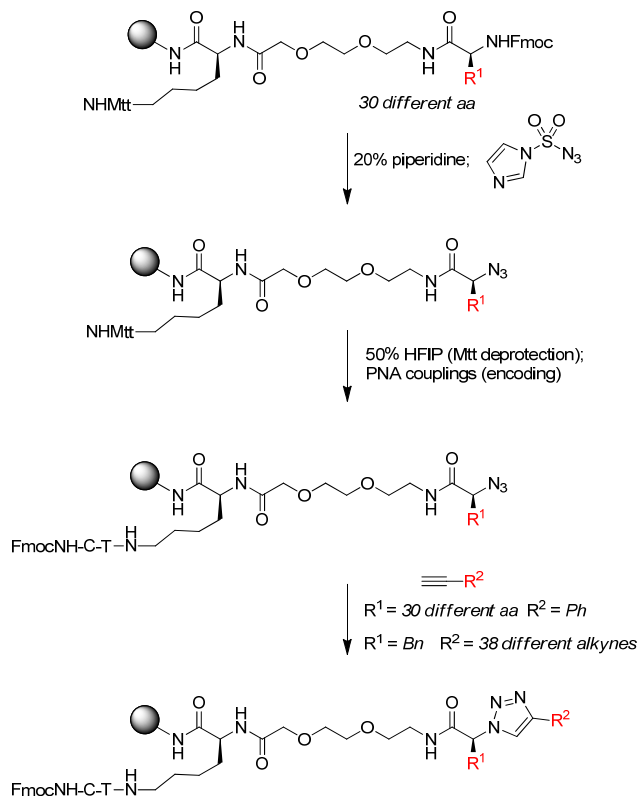

**Click reaction validation, 30 aa reacted with Phenylacetylene followed by Fmoc deprotection.**

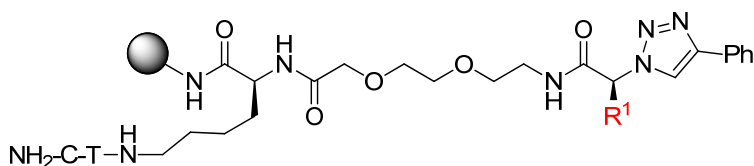

NovaPEG Rink amine resin (500 mg) was loaded with FmocLys(Mtt)OH (*procedure 5*) followed by capping of the un-reacted amine groups (*procedure 1*). Fmoc deprotection (*procedure 3*), loading of the spacer (*procedure 6*) and second Fmoc deprotection (*procedure 3*) yielded a resin that was split on to 30 different columns (10 mg of resin per column) for the loading of 30 different aminoacids in the Multi pep Synthesizer (*procedure 7* followed by *procedure 4*). Then, following *procedure 8* the Fmoc deprotected amino acids were oxidized to the corresponding azides. The orthogonal Mtt protecting group on the side chain of the Lys was then deprotected using the protocol described in *procedure 9* and monomers T and C were loaded onto all the different resins following *procedure 10*. Click reaction with phenyl acetylene following *procedure 12*, Fmoc deprotection (*procedure 4*) and cleavage of the compounds from the resin (*procedure 11*) allowed the analysis of the different aminoacids by Maldi. Asp, L-2-amino-3-(dimethylamino)-propionic acid, Leu and Pro did not give 100% conversions and were discharge as building blocks for the library synthesis.

| <b>Entry.</b> | <b>Aminoacid used</b>                      | <b>m/z (M+Na<sup>+</sup>)<br/>calculated</b> | <b>m/z (M+Na<sup>+</sup>)<br/>found</b> |
|---------------|--------------------------------------------|----------------------------------------------|-----------------------------------------|
| <b>1</b>      | 2S,3S)-2-amino-3-methoxybutanoic acid      | 1175.23                                      | 1174.39                                 |
| <b>2</b>      | (S)-2-amino-3-methoxypropionic acid        | 1161.23                                      | 1160.48                                 |
| <b>3</b>      | Alanine (Ala)                              | 1131.19                                      | 1130.48                                 |
| <b>4</b>      | allo-Thr                                   | 1161.19                                      | 1160.55                                 |
| <b>5</b>      | Arg                                        | 1194.30 (M+H <sup>+</sup> )                  | 1193.56 (M+H <sup>+</sup> )             |
| <b>6</b>      | Asn                                        | 1174.19                                      | 1173.51                                 |
| <b>7</b>      | Asp                                        | 1175.22                                      | X                                       |
| <b>8</b>      | D-Phe                                      | 1207.27                                      | 1206.46                                 |
| <b>9</b>      | Gln                                        | 1188.22                                      | 1187.48                                 |
| <b>10</b>     | Glu                                        | 1189.22                                      | 1188.62                                 |
| <b>11</b>     | Gly                                        | 1117.14                                      | 1116.50                                 |
| <b>12</b>     | His                                        | 1197.23                                      | 1196.49                                 |
| <b>13</b>     | Homoser                                    | 1161.19                                      | 1160.51                                 |
| <b>14</b>     | L-2-amino-3-(dimethylamino)-propionic acid | 1174.23                                      | X                                       |
| <b>15</b>     | L-4-Pyridylalanine                         | 1208.23                                      | 1207.50                                 |
| <b>16</b>     | L-allylglycine                             | 1135.22 (M+H <sup>+</sup> )                  | 1134.38 (M+H <sup>+</sup> )             |
| <b>17</b>     | L-beta-t-butylalanine                      | 1187.27                                      | 1186.53                                 |
| <b>18</b>     | L-cyclopropylglycine                       | 1157.20                                      | 1156.45                                 |
| <b>19</b>     | Leu                                        | 1173.25                                      | X                                       |
| <b>20</b>     | Ile                                        | 1173.25                                      | 1172.47                                 |
| <b>21</b>     | L-norTyr                                   | 1209.24                                      | 1208.46                                 |
| <b>22</b>     | Lys                                        | 1189.21                                      | 1187.51                                 |
| <b>23</b>     | Nle                                        | 1173.23                                      | 1172.46                                 |
| <b>24</b>     | Phe                                        | 1207.26                                      | 1206.53                                 |
| <b>25</b>     | Pro                                        | 1157.20                                      | X                                       |
| <b>26</b>     | Ser                                        | 1147.16                                      | 1146.41                                 |
| <b>27</b>     | Thr                                        | 1161.22                                      | 1160.61                                 |
| <b>28</b>     | Trp                                        | 1247.29                                      | 1245.52                                 |
| <b>29</b>     | Tyr                                        | 1223.26                                      | 1222.47                                 |
| <b>30</b>     | Val                                        | 1159.23                                      | 1158.50                                 |



**Click reaction validation, phenylalanine azide resin reacted with 38 different alkynes followed by Fmoc deprotection**

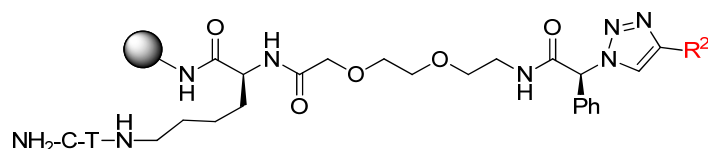

The corresponding resin loaded with phenylalanine was reacted with 38 different alkynes following **procedure 12**, Fmoc deprotection (**procedure 4**) and cleavage of the compounds from the resin (**procedure 11**) allowed the analysis by Maldi of the cycloaddition reaction with the different alkynes. All of them with the exception of Propargylamine hydrochloride worked with total conversion.

| Entry | Alkyne                          | m/z (M+Na <sup>+</sup> )<br>calculated | m/z (M+Na <sup>+</sup> )<br>found |
|-------|---------------------------------|----------------------------------------|-----------------------------------|
| 1     | 4-Ethynylanisole                | 1236.58                                | 1236.62                           |
| 2     | 1-Ethynyl-2-methoxybenzene      | 1236.82                                | 1236.62                           |
| 3     | 2-Ethynylaniline                | 1221.81                                | 1220.20                           |
| 4     | 1-Ethynyl-4-phenoxybenzene      | 1298.89                                | 1298.59                           |
| 5     | 4-Methyl-1-pentyne              | 1186.80                                | 1186.63                           |
| 6     | 4-Ethynylbiphenyl               | 1282.89                                | 1282.59                           |
| 7     | N-Methyl-N-propargylbenzylamine | 1263.89                                | 1263.63                           |
| 8     | 3-Ethynylanisole                | 1236.82                                | 1236.51                           |
| 9     | 2-Ethynyl-1,4-dimethylbenzene   | 1234.85                                | 1234.47                           |
| 10    | 3-Cyclohexyl-1-propyne          | 1226.87                                | 1226.56                           |
| 11    | 3-Dimethylamino-1-propyne       | 1187.79                                | 1187.64                           |
| 12    | N-Methylpropargylamine          | 1173.77                                | 1172.26                           |
| 13    | 2-Methyl-3-butyn-2-ol           | 1188.78                                | 1188.65                           |
| 14    | Cyclopentylacetylene            | 1198.81                                | 1198.62                           |
| 15    | 2-Ethynyltoluene                | 1220.82                                | 1220.53                           |
| 16    | 3-Ethynyltoluene                | 1220.82                                | 1220.56                           |
| 17    | 4-Ethynylaniline                | 1221.81                                | 1221.52                           |
| 18    | 3-Butyn-1-ol                    | 1174.75                                | 1174.51                           |
| 19    | 2-Ethynylbenzyl alcohol         | 1236.82                                | 1236.53                           |
| 20    | 1-Ethynyl-naphthalene           | 1256.85                                | 1256.55                           |
| 21    | 4-Ethynyltoluene                | 1220.82                                | 1220.47                           |
| 22    | Propargylamine hydrochloride    | 1196.20                                | X                                 |
| 23    | 3-Butyn-2-ol                    | 1174.75                                | 1173.23                           |
| 24    | Phenyl propargyl ether          | 1236.82                                | 1235.11                           |
| 25    | Cyclopropylacetylene            | 1170.76                                | 1169.23                           |
| 26    | 4-Pentyn-1-ol                   | 1188.78                                | 1187.20                           |
| 27    | 5-Methyl-1-hexyne               | 1200.83                                | 1199.26                           |
| 28    | 5-Methyl-1-hexyn-3-ol           | 1216.83                                | 1215.19                           |

|           |                                      |         |         |
|-----------|--------------------------------------|---------|---------|
| <b>29</b> | N-Propargylphthalimide               | 1289.84 | 1288.00 |
| <b>30</b> | 1-Pentyn-3-ol                        | 1188.78 | 1187.23 |
| <b>31</b> | 3,4-Dichlorophenylacetylene          | 1275.68 | 1273.05 |
| <b>32</b> | 3-Hydroxyphenylacetylene             | 1222.79 | 1222.56 |
| <b>33</b> | 4-(Trifluoromethoxy) phenylacetylene | 1290.79 | 1289.02 |
| <b>34</b> | 3-Ethynylaniline                     | 1221.81 | 1220.15 |
| <b>35</b> | Methyl propargyl ether               | 1174.75 | 1174.63 |
| <b>36</b> | 1-Ethynylcyclohexene                 | 1210.83 | 1209.27 |
| <b>37</b> | Phenylacetylene                      | 1206.79 | 1205.19 |
| <b>38</b> | 1-heptyne                            | 1200.83 | 1199.19 |

**Selected examples from the validation of different alkynes in the cycloaddition reaction.**

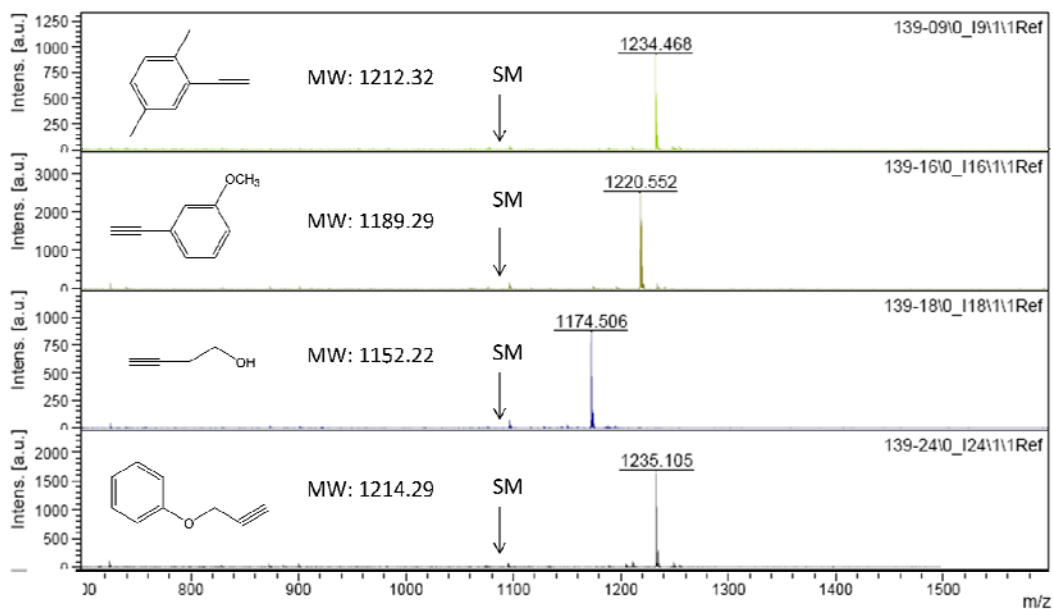

## 2.- 500 membered Triazole library synthesis

**First point of diversity 25 different aminoacids.** NovaPEG Rink amine resin (500 mg) was loaded with FmocLys(Mtt)OH (*procedure 5*) followed by capping of the unreacted amine groups (*procedure 1*). Fmoc deprotection (*procedure 3*), loading of the spacer (*procedure 6*) and second Fmoc deprotection (*procedure 3*) yielded a resin that was split on to 25 different columns (10 mg of resin per column) for the loading of 25 different aminoacids in the Multi pep Synthesizer (*procedure 7* followed by *procedure 4*). Then, following *procedure 8* the Fmoc deprotected amino acids were oxidized to the corresponding azides. The orthogonal Mtt protecting group on the side chain of the Lys was then de-protected using the protocol described in *procedure 9* and corresponding 7-mers were loaded onto all the different resins following *procedure 10*.

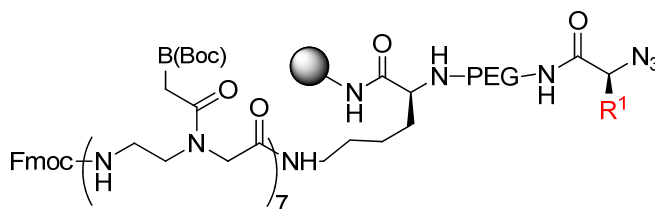

| No. | Aminoacid                             | CODON     | m/z calcul. | m/z found |
|-----|---------------------------------------|-----------|-------------|-----------|
| 1   | 2S,3S)-2-amino-3-methoxybutanoic acid | GCCG T*GG | 2686.54     | 2687.04   |
| 2   | (S)-2-amino-3-methoxypropionic acid   | GCCG C*CG | 2617.53     | 2617.26   |
| 3   | Ala                                   | GCCG G*CA | 2611.48     | 2611.96   |
| 4   | allo-Thr                              | GCCG C*GA | 2641.50     | 2642.52   |
| 5   | Arg                                   | GCCG G*GC | 2712.59     | 2713.13   |
| 6   | Asn                                   | GGAA T*GG | 2733.55     | 2734.95   |
| 7   | D-Phe                                 | GGAA C*CG | 2711.59     | 2712.13   |
| 8   | Gln                                   | GGAA G*CA | 2716.55     | 2716.69   |
| 9   | Glu                                   | GGAA C*GA | 2717.55     | 2718.02   |
| 10  | Gly                                   | GGAA G*GC | 2661.47     | 2661.99   |
| 11  | His                                   | CGGC T*GG | 2708.54     | 2709.62   |
| 12  | Homoser                               | CGGC C*CG | 2617.49     | 2618.06   |
| 13  | L-4-Pyridylalanine                    | CGGC G*CA | 2688.54     | 2689.13   |
| 14  | L-beta-t-butylalanine                 | CGGC C*GA | 2667.58     | 2668.16   |
| 15  | L-cyclopropylglycine                  | CGGC G*GC | 2653.51     | 2653.93   |
| 16  | Leu                                   | AAGG T*GG | 2732.58     | 2733.07   |
| 17  | Ile                                   | AAGG C*CG | 2677.57     | 2678.61   |
| 18  | Lys                                   | AAGG G*CA | 2717.54     | 2717.11   |
| 19  | Nle                                   | AAGG C*GA | 2701.56     | X         |

|           |     |           |         |         |
|-----------|-----|-----------|---------|---------|
| <b>20</b> | Phe | AAGG G*GC | 2751.58 | 2752.05 |
| <b>21</b> | Ser | GAAC T*GG | 2666.48 | 2667.02 |
| <b>22</b> | Thr | GAAC C*CG | 2625.54 | 2625.98 |
| <b>23</b> | Trp | GAAC G*CA | 2735.62 | 2736.02 |
| <b>24</b> | Tyr | GAAC C*GA | 2711.59 | 2712.10 |
| <b>25</b> | Val | GAAC G*GC | 2663.55 | X       |

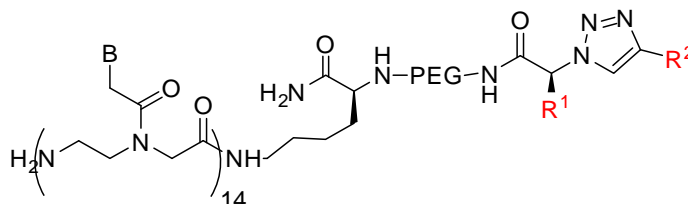

**Second point of diversity, 20 different alkynes.** The resins from the previous reactions were combined, thoroughly mixed and redistributed into 20 columns. Resin transfers were carried out as slurry in DCM/DMF using pipetting.

Maldi of the 25 different resins mix:

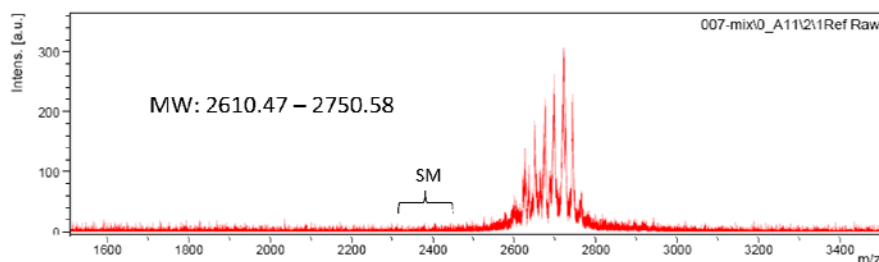

After click cycloaddition reaction with one alkyne per column (*procedure 12*) the second PNA codon (7mer) was introduced following *procedure 10*. The success of the reactions in each pool was assessed by MALDI showing complete conversions.

| No.      | Alkyne                          | CODON     | m/z (M+H <sup>+</sup> )<br>calcul. range | m/z (M+H <sup>+</sup> )<br>found range |
|----------|---------------------------------|-----------|------------------------------------------|----------------------------------------|
| <b>1</b> | 4-Ethynylanisole                | GTG* CGAA | 4717.31-<br>4857.42                      | 4700-4900                              |
| <b>2</b> | 1-Ethynyl-2-methoxybenzene      | GTG* GAGA | 4757.32-<br>4897.43                      | 4750-4950                              |
| <b>3</b> | 2-Ethynylaniline                | GTG* CAGG | 4718.30-<br>4858.41                      | 4700-4900                              |
| <b>4</b> | 1-Ethynyl-4-phenoxybenzene      | GTG* GACG | 4795.38-<br>4935.49                      | 4750-4950                              |
| <b>5</b> | N-Methyl-N-propargylbenzylamine | GCA* CGAA | 4713.39-<br>4853.50                      | 4700-4900                              |

|    |                           |           |                 |           |
|----|---------------------------|-----------|-----------------|-----------|
| 6  | 3-Ethynylanisole          | GCA* GAGA | 4726.33-4866.44 | 4700-4900 |
| 7  | 3-Cyclohexyl-1-propyne    | GCA* CAGG | 4692.36-4832.47 | 4650-4850 |
| 8  | 3-Dimethylamino-1-propyne | GCA* GACG | 4653.28-4793.39 | 4650-4850 |
| 9  | 2-Methyl-3-butyn-2-ol     | ACG* CGAA | 4638.28-4778.39 | 4600-4800 |
| 10 | 4-Ethynylaniline          | ACG* GAGA | 4711.32-4851.43 | 4700-4900 |
| 11 | 3-Butyn-1-ol              | ACG* CAGG | 4640.24-4780.35 | 4600-4800 |
| 12 | 3-Butyn-2-ol              | ACG* GACG | 4640.24-4780.35 | 4600-4800 |
| 13 | Phenyl propargyl ether    | CGA* CGAA | 4686.32-4826.43 | 4650-4850 |
| 14 | Cyclopropylacetylene      | CGA* GAGA | 4660.27-4800.38 | 4650-4850 |
| 15 | 4-Pentyn-1-ol             | CGA* CAGG | 4654.27-4794.38 | 4650-4850 |
| 16 | N-Propargylphthalimide    | CGA* GACG | 4755.33-4895.44 | 4750-4950 |
| 17 | 3-Hydroxyphenylacetylene  | AGC* CGAA | 4672.29-4812.40 | 4650-4850 |
| 18 | 3-Ethynylaniline          | AGC* GAGA | 4711.32-4851.43 | 4700-4900 |
| 19 | Phenylacetylene           | AGC* CAGG | 4672.28-4812.39 | 4650-4850 |
| 20 | 1-heptyne                 | AGC* GACG | 4666.32-4806.43 | 4650-4850 |

### Library final MALDI.

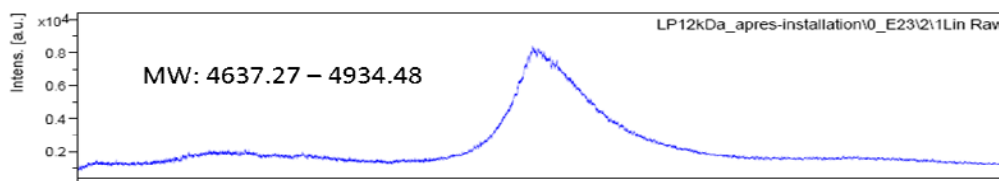

### 3.- Validation of the pyrimidines and pyrazoles library.

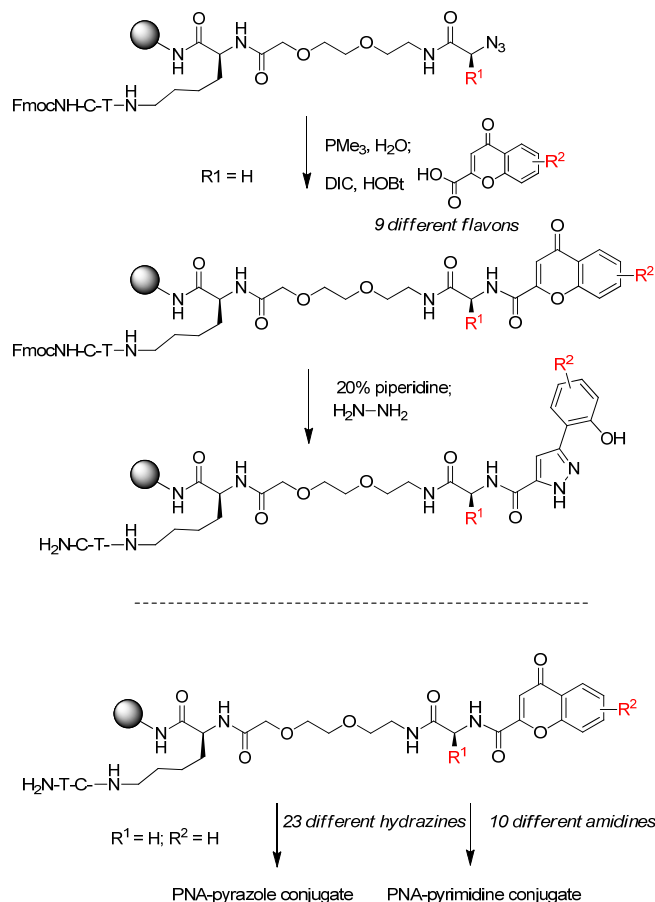

#### Reaction of 9 different flavones with hydrazine.

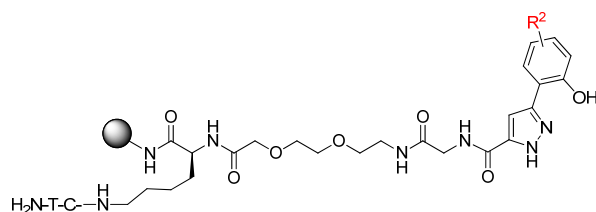

NovaPEG Rink amine resin was loaded with FmocLys(Mtt)OH (*procedure 5*) followed by capping of the un-reacted amine groups (*procedure 1*). Fmoc deprotection (*procedure 3*), loading of the spacer (*procedure 6*) and second Fmoc deprotection (*procedure 3*) yielded a resin that was coupled with alanine (*procedure 7* followed by *procedure 4*) Then, following *procedure 8* the Fmoc deprotected amino acids were oxidized to the corresponding azides. The orthogonal Mtt protecting group on the side chain of the Lys was then de-protected using the protocol described in *procedure 9* and monomers T and C were loaded onto the resin following *procedure 10*. The resin was then distributed in five columns in the Multi pep Synthesizer and the azides were

reduced (*procedure 15*). Then the resins were coupled with 9 different flavones following *procedure 13* and capped using *procedure 2*. Finally the resins were reacted with hydrazine following *procedure 14* and the compounds were cleaved from the resin (*procedure 11*) and analyzed by Maldi. Flavone **5** and **8** did not give clean reaction product with hydrazine.

| No.      | Flavone                                                                             | Compound                                                                            | m/z (M+Na <sup>+</sup> )<br>calcul. | m/z (M+Na <sup>+</sup> )<br>found |
|----------|-------------------------------------------------------------------------------------|-------------------------------------------------------------------------------------|-------------------------------------|-----------------------------------|
| <b>1</b> | 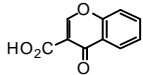   |    | 1264.30                             | 1264.49                           |
| <b>2</b> |    |    | 1264.30                             | 1264.44                           |
| <b>3</b> |    |    | 1344.19                             | 1344.33                           |
| <b>4</b> |    |    | 1348.42<br>M+H <sup>+</sup>         | 1348.52<br>M+H <sup>+</sup>       |
| <b>5</b> |    |    | 1256.33<br>M+H <sup>+</sup>         | 20% impurity                      |
| <b>6</b> |   |   | 1348.41<br>M+H <sup>+</sup>         | 1348.58<br>M+H <sup>+</sup>       |
| <b>7</b> |  |  | 1322.41<br>M+H <sup>+</sup>         | 1322.36<br>M+H <sup>+</sup>       |
| <b>8</b> |  |  | 1282.36<br>M+H <sup>+</sup>         | X                                 |
| <b>9</b> |  |  | 1321.42<br>M+H <sup>+</sup>         | 1322.13<br>M+H <sup>+</sup>       |

### Maldis for the validation of the 9 different flavones with hydrazine.

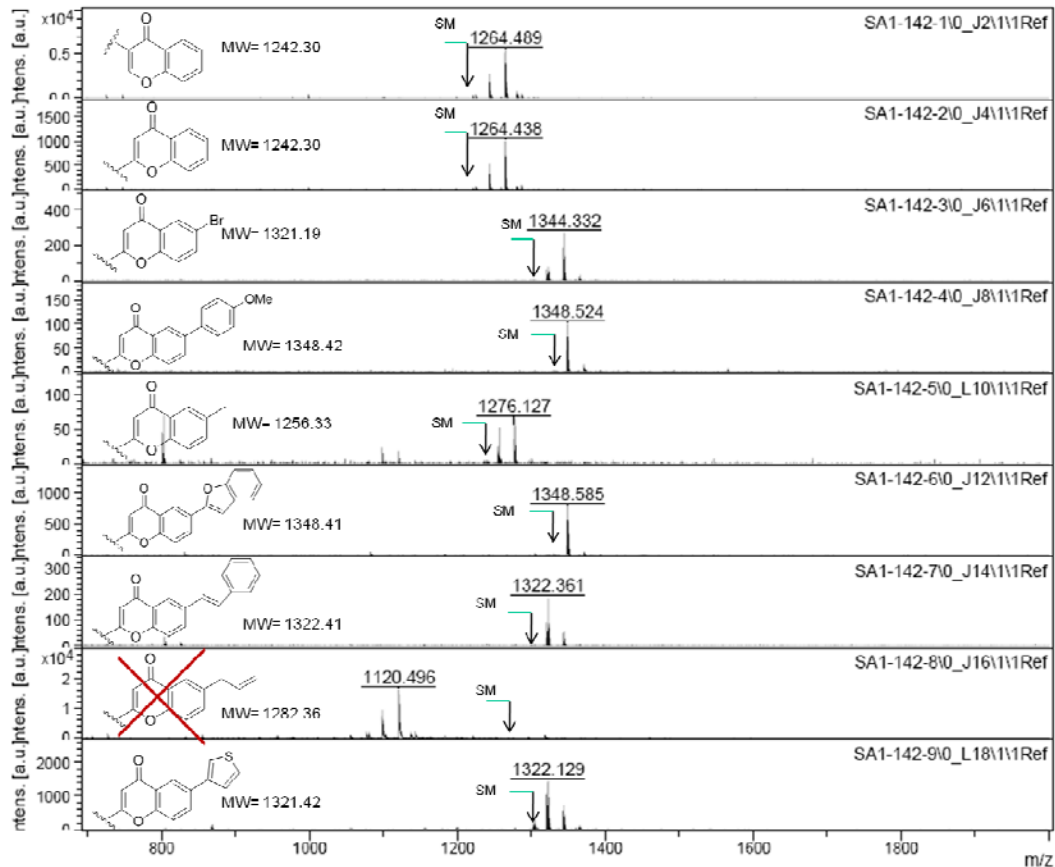

### Reaction of flavone 1 with 23 hydrazines and 10 amidinium salts.

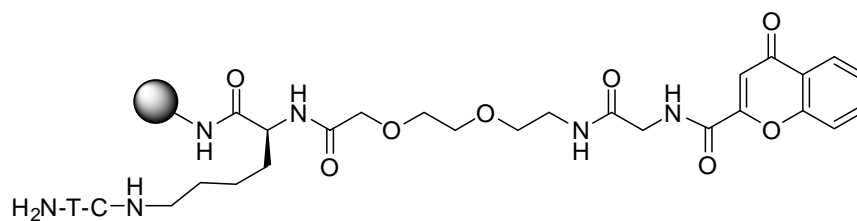

NovaPEG Rink amine resin was loaded with FmocLys(Mtt)OH (*procedure 5*) followed by capping of the un-reacted amine groups (*procedure 1*). Fmoc deprotection (*procedure 3*), loading of the spacer (*procedure 6*) and second Fmoc deprotection (*procedure 3*) yielded a resin that was coupled with alanine (*procedure 7* followed by *procedure 4*) Then, following *procedure 8* the Fmoc deprotected amino acids were oxidized to the corresponding azides. The orthogonal Mtt protecting group on the side chain of the Lys was then deprotected using the protocol described in *procedure 9* and monomers C and T were loaded onto the resin following *procedure 10*. After azide reduction (*procedure 15*), flavon 1 was coupled to the resin followed by a capping protocol (*procedure 1*). The resin was then distributed onto 33 columns in the Multiprep Synthesizer swollen in CH<sub>2</sub>Cl<sub>2</sub> for 20 min and then reacted with 23 different hydrazines



and 10 amidinium salts following *procedure 14*. The compounds were cleaved from the resin (*procedure 11*) and analyzed by LC-MS.

| Entry | Hydrazines or amidinium salts                                                       | m/z (M+H <sup>+</sup> ) calcul. | m/z (M+H <sup>+</sup> ) found |
|-------|-------------------------------------------------------------------------------------|---------------------------------|-------------------------------|
| 1     | N <sub>2</sub> H <sub>4</sub>                                                       | 204.32                          | 205.21                        |
| 2     | MeNHNH <sub>2</sub>                                                                 | 218.44                          | 219.24                        |
| 3     | PhNHNH <sub>2</sub>                                                                 | 280.14                          | 281.22                        |
| 4     | BnNHNH <sub>2</sub>                                                                 | 294.14                          | 296.33                        |
| 5     | NH <sub>2</sub> OH                                                                  | 205.99                          | 206.33                        |
| 6     | <i>t</i> BuNHNH <sub>2</sub>                                                        | 260.34                          | 261.25                        |
| 7     | 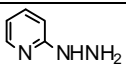   | 281.35                          | 282.35                        |
| 8     |    | 332.18                          | 333.44                        |
| 9     |    | 332.18                          | 333.33                        |
| 10    | H <sub>2</sub> NHN-CH <sub>2</sub> -CH <sub>2</sub> -OH                             | 248.10                          | 249.30                        |
| 11    | H <sub>2</sub> NHN-CH <sub>2</sub> -CH <sub>2</sub> -CN                             | 255.66                          | 256.19                        |
| 12    |   | 313.44                          | 314.55                        |
| 13    |  | 358.68                          | 359.76                        |
| 14    |  | 372.14                          | 373.17                        |
| 15    |  | 361.60                          | 362.77                        |
| 16    |  | 395.50                          | 396.20                        |
| 17    |  | 324.15                          | 325.55                        |
| 18    |  | 313.44                          | 314.43                        |
| 19    |  | 348.36                          | 349.22                        |
| 20    |  | 321.34                          | 322.24                        |
| 21    |  | 344.66                          | 345.66                        |
| 22    |  | 320.45                          | 321.24                        |

|    |                                                                                     |        |        |
|----|-------------------------------------------------------------------------------------|--------|--------|
| 23 | 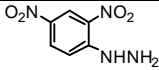   | 370.14 | 371.22 |
| 24 |    | 246.18 | 247.77 |
| 25 |    | 266.50 | 267.44 |
| 26 |    | 328.61 | 329.61 |
| 27 |    | 380.09 | 381.90 |
| 28 |    | 380.09 | 381.44 |
| 29 |    | 360.63 | 361.74 |
| 30 |    | 342.86 | 343.76 |
| 31 |    | 374.71 | 375.22 |
| 32 |   | 273.13 | 274.33 |
| 33 |  | 276.59 | X      |

#### 4.- 500 membered pyrimidines and pyrazoles library synthesis

**First point of diversity, 5 different aminoacids.** NovaPEG Rink amine resin (250 mg) was loaded with FmocLys(Mtt)OH (*procedure*) followed by capping of the un-reacted amine groups (*procedure 1*). Fmoc deprotection (*procedure 3*), loading of the spacer (*procedure 6*) and second Fmoc deprotection (*procedure 3*) yielded a resin that was split on to 5 different columns (50 mg of resin per column) for the loading of 5 different amino acids in the Multi pep Synthesizer (*procedure 7* followed by *procedure 4*). Then, following *procedure 8* the Fmoc deprotected amino acids were oxidized to the corresponding azides. The orthogonal Mtt protecting group on the side chain of the Lys was then de-protected using the protocol described in *procedure 9* and corresponding 4-mers were loaded onto all the five different resins following *procedure 10*. Maldi analysis of an analytical cleavage from each resin confirmed the completion of each sequence.

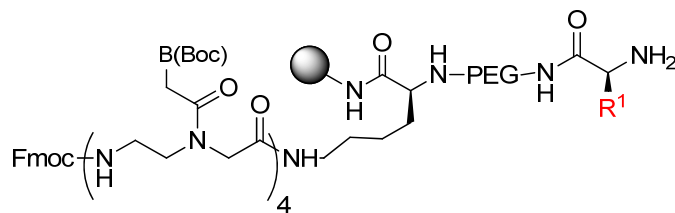

R<sup>1</sup>= Phe (GCCG), Val (GGAA), Leu (CGGC), Ala (AAGG), Ile (GAAC)

**Second point of diversity, 5 different flavones.** The 5 resins prepared in the previous step were suspended in 0.5 mL CH<sub>2</sub>Cl<sub>2</sub> and mixed together in a SPE tube. The resin was shaken for 30 minutes, washed with 2 x CH<sub>2</sub>Cl<sub>2</sub> and then the resin was distributed in 5 different columns in the MultiPep Synthesizer. Then the azide group was reduced following *procedure 15* and each of the resins was coupled to a different flavon (*procedure 13*) and capped (*procedure 2*). PNA encoding according to *procedure 10* was then carried out.

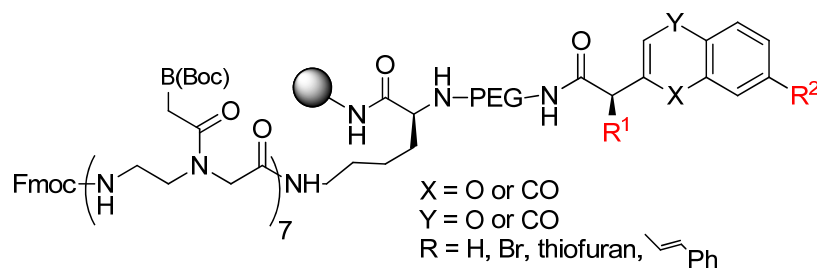

| Entry | Flavon                                                                              | CODON | m/z (M+Na <sup>+</sup> )<br>calcul.                                            | m/z (M+Na <sup>+</sup> )<br>found                                            |
|-------|-------------------------------------------------------------------------------------|-------|--------------------------------------------------------------------------------|------------------------------------------------------------------------------|
| 1     | 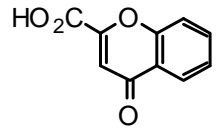 | T*GG  | Phe: 2661.53<br>Val: 2691.43<br>Leu: 2693.42<br>Ala: 2691.44<br>Ile: 2691.43   | Phe: 2661.92<br>Val: 2692.99<br>Leu: 2694.42<br>Ala: 2692.99<br>Ile: 2692.99 |
|       |  | C*CG  | Phe: 2661.51<br>Val: 2661.43<br>Leu: 2774.41<br>Ala: 2680.43<br>Ile: 2762.43   | Phe: 2661.92<br>Val: 2662.09<br>Leu: 2776.42<br>Ala: 2681.43<br>Ile: 2763.41 |
| 3     |  | G*CA  | Phe: 2930.42<br>Val: 2811.34<br>Leu: : 2877.32<br>Ala: 2883.34<br>Ile: 2885.34 | Phe: 2931.93<br>Val: 2813.35<br>Leu: 2878.32<br>Ala: 2883.24<br>Ile: 2886.35 |

|   |                                                                                   |      |                                                                                     |                                                                                   |
|---|-----------------------------------------------------------------------------------|------|-------------------------------------------------------------------------------------|-----------------------------------------------------------------------------------|
| 4 | 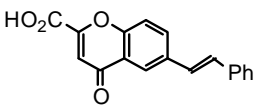 | C*GA | Phe: 2834.62<br>Val: 2874.64<br>Leu: 2890.62<br>Ala: 2906.54<br>Ile: 2908.64        | Phe: 2832.56<br>Val: 2874.54<br>Leu: 2891.45<br>Ala: 2905.54<br>Ile: 2909.54      |
| 5 |  | G*GC | Phe: 2930.617<br>Val: 2930.5394<br>Leu: 2896.517<br>Ala: 2892.539<br>Ile: 2894.6332 | Phe: 2932.312<br>Val: 2931.235<br>Leu: 2897.613<br>Ala: 2892.543<br>Ile: 2895.654 |

**Third point of diversity, 20 different hydrazines or amidinium salts.**

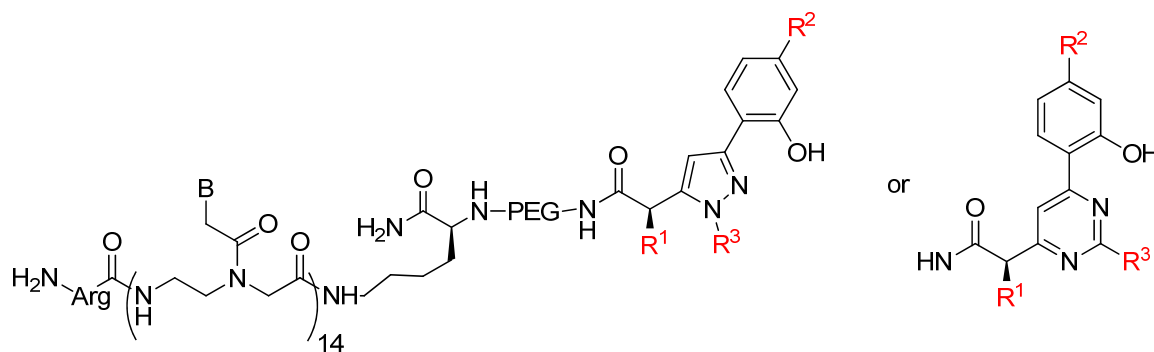

The five resin pools were mixed in a 12 mL tube, swollen with CH<sub>2</sub>Cl<sub>2</sub> (20 min) and split in 20 columns (12.5 mg) in the MultiPep Synthesizer. The corresponding amidine or hydrazine was coupled following *procedure 14* and after Fmoc deprotection (*procedure 4*) the corresponding 7mers were coupled following *procedure 10*. Final Fmoc deprotection (*procedure 4*) and cleavage of the compounds from the resin (*procedure 11*) gave 20 different pools. Each pool was analyzed by MALDI to confirm the completion of the reaction sequence.

| Entry | Hydrazine/ammidine  | CODON   | m/z (M+Na <sup>+</sup> )<br>calcul. range | m/z (M+Na <sup>+</sup> )<br>found |
|-------|---------------------|---------|-------------------------------------------|-----------------------------------|
| 1     | Hydrazine           | GTGCGAA | 4984.37-<br>5140.50                       | 4998.5-5249.17                    |
| 2     | Methylhydrazine     | GTGGAGA | 5038.39-<br>5198.63                       | 5050.34-5200.43                   |
| 3     | Hydroxylamine       | GTGCAGG | 5001.35-<br>5161.59                       | 5010.23-5176.33                   |
| 4     | 2-Hydrozinopyridine | GTGGACG | 5099.39-<br>5257.63                       | 5100.22-5260.13                   |

|           |                                             |         |                     |                 |
|-----------|---------------------------------------------|---------|---------------------|-----------------|
| <b>5</b>  | Hydralazine                                 | GCAAGGC | 5097.41-<br>5257.64 | 5099.22-5288.01 |
| <b>6</b>  | p-Tolylhydrazine                            | GCACGAA | 5043.42-<br>5203.66 | 5050.22-5205.11 |
| <b>7</b>  | 4-tButylhydrazine                           | GCAGAGA | 5131.47-<br>5291.70 | 5129.43-5300.21 |
| <b>8</b>  | 4-Nitrophenylhydrazine                      | GCACAGG | 5090.38-<br>5250.62 | 5100.23-5260.33 |
| <b>9</b>  | 4-Hydrazinobenzoic acid                     | ACGGACG | 5089.39-<br>5249.62 | 5090.22-5250.99 |
| <b>10</b> | 3-<br>(Trifluoromethyl)phenylhydra-<br>zine | ACGAGGC | 5113.39-<br>5273.62 | 5110.88-5285.44 |
| <b>11</b> | 2-Ethylphenylhydrazine                      | ACGCGAA | 5057.14-<br>5217.37 | 5060.33-5216.44 |
| <b>12</b> | 3,4-Dimethylphenylhydrazine                 | ACGGAGA | 5097.45-<br>5257.68 | 5100.22-5260.44 |
| <b>13</b> | 4-Chloro- <i>o</i> -tolylhydrazine          | CGACAGG | 5094.07-<br>5254.30 | 5098.33-5253.99 |
| <b>14</b> | Acetamidine                                 | CGAGACG | 4995.54-<br>5155.77 | 4998.33-5160.33 |
| <b>15</b> | Benzamidine                                 | CGAAGGC | 5057.40-<br>5217.63 | 5060.33-5210.44 |
| <b>16</b> | 3-Aminobenzamidine                          | CGACGAA | 5056.63-<br>5216.87 | 5070.33-5210.33 |
| <b>17</b> | 4-Aminobenzamidine                          | AGCGAGA | 5096.64-<br>5256.88 | 5098.22-5254.66 |
| <b>18</b> | 2-(Phenylthio)ethanimidamide                | AGCCAGG | 5071.41-<br>5231.65 | 5077.22-5230.55 |
| <b>19</b> | 3-methylbenzamidine                         | AGCGACG | 5038.39-<br>5198.62 | 5035.44-5199.22 |
| <b>20</b> | Malonamidine                                | AGCAGGC | 5043.22-<br>5100.23 | 5042.33-5102.33 |

### Library final MALDI.

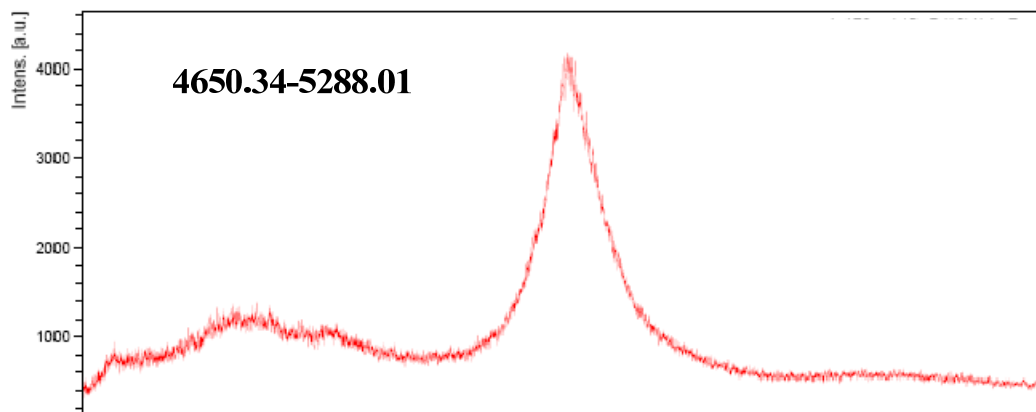

**5. 125 membered N-terminus natural product/active compound library synthesis** PNA prepared according to *procedure 10* were derivatized with commercially available pharmacophores by coupling of an acid, sulfonyl chloride, alcohol or amine.

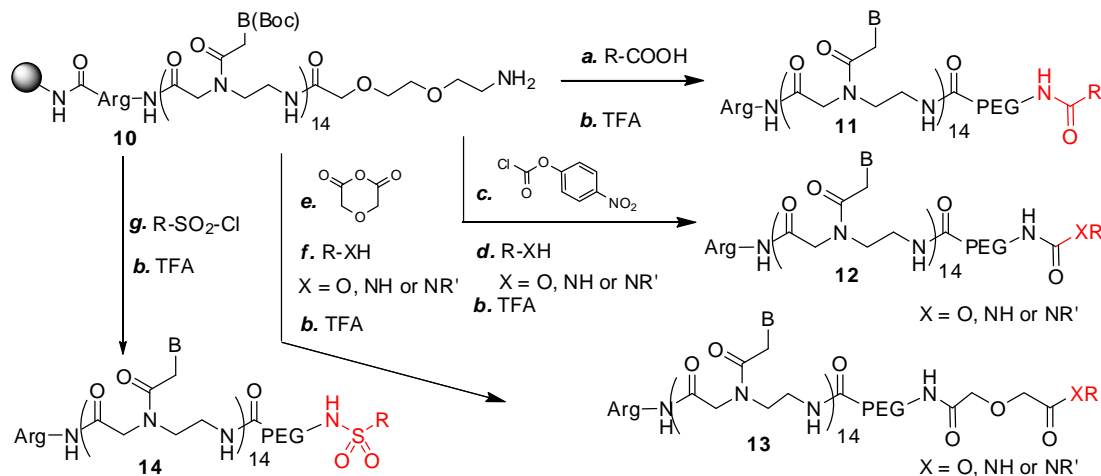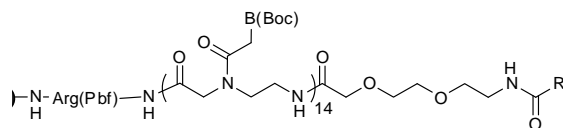

**Carboxylic acid coupling.** The corresponding carboxylic acid (0.01 mmol, 5.0 equiv) was dissolved in 200  $\mu$ L of NMP and HOBt (1.5 mg, 0.01 mmol, 5.0 equiv) followed by diisopropylcarbodiimide (4.7  $\mu$ L, 0.03 mmol, 15.0 equiv) were added. The mixture was stirred for 15 min and then added to the corresponding resin. The reaction was shaken for 8 hours at r.t. Finally, the resin was washed with DMF and  $\text{CH}_2\text{Cl}_2$ .

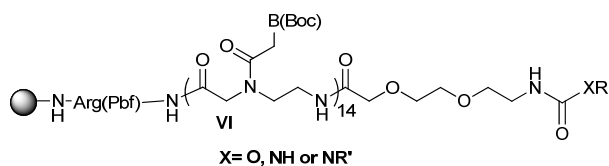

**Alcohol/amine coupling via chloroformate activation** 4-nitrophenyl chloroformate (3.2 mg, 0.016 mmol, 8.0 equiv) and 2,6 lutidine (3.8  $\mu$ L, 0.032 mmol, 16.0 equiv) were dissolved in 200  $\mu$ L of 1,2-dichloroethane (solution A). 4-DMAP (2 mg, 0.016 mmol, 8 equiv) was dissolved in 28  $\mu$ L of 1,2-dichloroethane (solution B). Solution A, followed by solution B were added to the corresponding resin and the reaction was shaken for 16h at r.t. The resin was subsequently washed with 1,2-dichloroethane, and the activation procedure was repeated a second time. Finally, the resin was washed with DMF and  $\text{CH}_2\text{Cl}_2$ . The alcohol or amine (0.07 mmol, 35.0 equiv), followed by DIPEA (23.1  $\mu$ L, 0.14 mmol, 70.0 equiv – only for amine hydrochlorides) and DMAP (24.4 mg, 0.20 mmol, 100.0 equiv) were dissolved in 280  $\mu$ L 1,2-dichloroethane. Then, the solution was added to the corresponding resin, and the reaction was shaken for 16 hours at 50°C. Finally, the resin was washed with DMF and  $\text{CH}_2\text{Cl}_2$ .

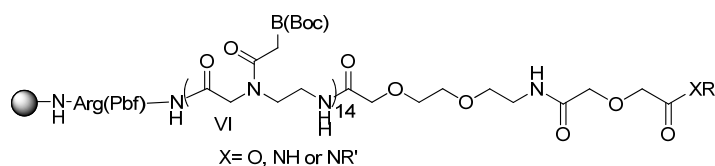

**Alcohol/amine coupling via diglycolic anhydride** Diglycolic anhydride (2.3 mg, 0.02 mmol, 10.0 equiv) and 2,6 lutidine (4.7  $\mu$ L, 0.04 mmol, 20.0 equiv) were dissolved in 200  $\mu$ L NMP. The solution was added to the resin and the reaction was shaken for 16 h at r.t. Finally, the resin was washed with DMF and  $\text{CH}_2\text{Cl}_2$ . BOP (7.1 mg, 0.016 mmol, 8.0 equiv), HOBT (2.5 mg, 0.016 mmol, 8.0 equiv) and DIPEA (4.2  $\mu$ L, 0.024 mmol, 12.0 equiv) were dissolved in 100  $\mu$ L NMP. The solution was added to the corresponding resin and the reaction was shaken for 20 min. Amine or alcohol (0.02 mmol, 10.0 equiv), followed by DIPEA (6.7  $\mu$ L, 0.04 mmol, 20.0 equiv – only for amine hydrochlorides) and DMAP (4.9 mg, 0.040 mmol, 20 equiv) were dissolved in 100  $\mu$ L NMP. The solution was subsequently added to the resin, after removing the activation solution, and the reaction was shaken for 16h at 35°C. Finally, the resin was washed with DMF and  $\text{CH}_2\text{Cl}_2$ .

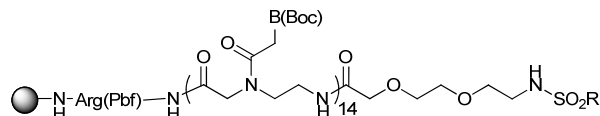

**Sulfonyl chlorides coupling** The resins were treated with a solution of the corresponding sulfonyl chloride (0.02 mmol, 10.0 equiv) and DIPEA (0.04 mmol, 20.0

equiv) in 200 $\mu$ L of NMP. The reaction was shaken for 8 hours at r.t. Finally, the resin was washed with DMF and CH<sub>2</sub>Cl<sub>2</sub>.



| Nr. | PNA Sequence |      |      |      | Structure                                                                            | Final [M+H <sup>+</sup> ] |         |
|-----|--------------|------|------|------|--------------------------------------------------------------------------------------|---------------------------|---------|
|     |              |      |      |      |                                                                                      | calc                      | found   |
| 1   | GCCG         | T*GG | GTG* | AGGC | 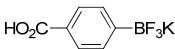   | 4672.80<br>(+TFA)         | 4675.32 |
| 2   | GCCG         | C*CG | GTG* | AGGC |    | 4481.89                   | 4479.17 |
| 3   | GCCG         | G*CA | GTG* | AGGC |    | 4550.04                   | 4547.11 |
| 4   | GCCG         | C*GA | GTG* | AGGC |    | 4796.34                   | 4792.74 |
| 5   | GCCG         | G*GC | GTG* | AGGC |    | 4635.16                   | 4632.71 |
| 6   | GCCG         | T*GG | GCA* | AGGC |    | 4640.13                   | 4645.32 |
| 7   | GCCG         | C*CG | GCA* | AGGC |    | 4788.31                   | 4789.00 |
| 8   | GCCG         | G*CA | GCA* | AGGC |   | 4787.40                   | 4787.55 |
| 9   | GCCG         | C*GA | GCA* | AGGC |  | 4766.32                   | 4762.33 |
| 10  | GCCG         | G*GC | GCA* | AGGC |  | 4555.06                   | 4547.43 |
| 11  | GCCG         | T*GG | ACG* | AGGC |  | 4588.13                   | 4587.45 |
| 12  | GCCG         | C*CG | ACG* | AGGC |  | 4545.13                   | 4545.94 |
| 13  | GCCG         | G*CA | ACG* | AGGC |  | 4729.40                   | 4725.22 |
| 14  | GCCG         | C*GA | ACG* | AGGC |  | 4584.16                   | 4581.27 |

|    |      |      |      |      |                                                                                      |         |         |
|----|------|------|------|------|--------------------------------------------------------------------------------------|---------|---------|
| 15 | GCCG | G*GC | ACG* | AGGC | 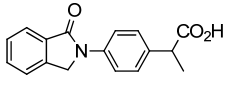   | 4624.17 | 4626.36 |
| 16 | GCCG | T*GG | CGA* | AGGC |    | 4719.28 | 4713.31 |
| 17 | GCCG | C*CG | CGA* | AGGC |    | 4547.17 | 4542.02 |
| 18 | GCCG | G*CA | CGA* | AGGC |    | 4559.16 | 4555.95 |
| 19 | GCCG | C*GA | CGA* | AGGC |    | 4577.22 | 4571.90 |
| 20 | GCCG | G*GC | CGA* | AGGC |    | 4597.19 | 4591.68 |
| 21 | GCCG | T*GG | AGC* | AGGC |    | 4719.67 | 4715.05 |
| 22 | GCCG | C*CG | AGC* | AGGC |  | 4660.66 | 4660.34 |
| 23 | GCCG | G*CA | AGC* | AGGC |  | 4683.28 | 4669.40 |
| 24 | GCCG | C*GA | AGC* | AGGC |  | 4661.28 | 4662.96 |
| 25 | GCCG | G*GC | AGC* | AGGC |  | 4561.03 | 4557.15 |
| 26 | GGAA | T*GG | GTG* | AGGC |  | 4747.60 | 4742.71 |
| 27 | GGAA | C*CG | GTG* | AGGC |  | 4559.30 | 4557.49 |
| 28 | GGAA | G*CA | GTG* | AGGC |  | 4686.43 | 4683.63 |

|    |      |      |      |      |                                                                                      |         |         |
|----|------|------|------|------|--------------------------------------------------------------------------------------|---------|---------|
| 29 | GGAA | C*GA | GTG* | AGGC | 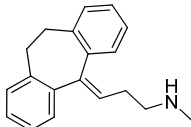   | 4713.10 | 4708.72 |
| 30 | GGAA | G*GC | GTG* | AGGC |    | 4725.50 | 4719.16 |
| 31 | GGAA | T*GG | GCA* | AGGC |    | 4720.32 | 4713.54 |
| 32 | GGAA | T*CG | GCA* | AGGC |    | 4767.57 | 4764.76 |
| 33 | GGAA | G*CA | GCA* | AGGC |    | 4611.34 | 4606.96 |
| 34 | GGAA | C*GA | GCA* | AGGC |   | 4704.51 | 4691.44 |
| 35 | GGAA | G*GC | GCA* | AGGC |  | 4593.06 | 4594.33 |
| 36 | GGAA | T*GG | ACG* | AGGC |  | 4664.40 | 4658.51 |
| 37 | GGAA | C*CG | ACG* | AGGC |  | 4627.47 | 4623.11 |
| 38 | GGAA | G*CA | ACG* | AGGC |  | 4503.25 | 4497.52 |
| 39 | GGAA | C*GA | ACG* | AGGC |  | 4612.41 | 4607.06 |
| 40 | GGAA | G*GC | ACG* | AGGC |  | 4588.30 | 4584.00 |
| 41 | GGAA | T*GG | CGA* | AGGC |  | 4677.11 | 4671.97 |

|    |      |      |      |      |                                                                                      |                               |                               |
|----|------|------|------|------|--------------------------------------------------------------------------------------|-------------------------------|-------------------------------|
| 42 | GGAA | C*CG | CGA* | AGGC | 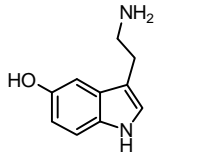   | 4571.34                       | 4563.98                       |
| 43 | GGAA | G*CA | CGA* | AGGC |    | 4825.64                       | 4819.54                       |
| 44 | GGAA | C*GA | CGA* | AGGC |    | 4845.32                       | 4843.97                       |
| 45 | GGAA | G*GC | CGA* | AGGC |    | 4719.46                       | 4717.53                       |
| 46 | GGAA | T*GG | AGC* | AGGC |    | 4629.34                       | 4623.67                       |
| 47 | GGAA | C*CG | AGC* | AGGC |   | 4672.52                       | 4667.43                       |
| 48 | GGAA | G*CA | AGC* | AGGC |  | 4718.54                       | 4713.30                       |
| 49 | GGAA | C*GA | AGC* | AGGC |  | 4682.51                       | 4676.53                       |
| 50 | GGAA | G*GC | AGC* | AGGC |  | 4754.07<br>(-N <sub>3</sub> ) | 4755.89<br>(-N <sub>3</sub> ) |
| 51 | CGGC | T*GG | GTG* | AGGC |  | 4643.20                       | 4638.52                       |
| 52 | CGGC | C*CG | GTG* | AGGC |  | 4540.19                       | 4534.44                       |
| 53 | CGGC | G*CA | GTG* | AGGC |  | 4523.10                       | 4518.56                       |
| 54 | CGGC | C*GA | GTG* | AGGC |  | 4567.07                       | 4559.46                       |

|    |      |      |      |      |                                                                                      |         |         |
|----|------|------|------|------|--------------------------------------------------------------------------------------|---------|---------|
| 55 | CGGC | G*GC | GTG* | AGGC | 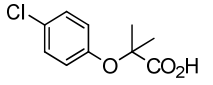   | 4588.55 | 4583.12 |
| 56 | CGGC | T*GG | GCA* | AGGC |    | 4885.56 | 4878.23 |
| 57 | CGGC | C*CG | GCA* | AGGC |    | 4699.33 | 4697.64 |
| 58 | CGGC | G*CA | GCA* | AGGC |    | 4656.22 | 4653.64 |
| 59 | CGGC | C*GA | GCA* | AGGC |    | 4734.27 | 4731.07 |
| 60 | CGGC | G*GC | GCA* | AGGC |    | 4593.02 | 4586.60 |
| 61 | CGGC | T*GG | ACG* | AGGC |   | 4556.13 | 4551.66 |
| 62 | CGGC | C*CG | ACG* | AGGC |  | 4452.05 | 4446.79 |
| 63 | CGGC | G*CA | ACG* | AGGC |  | 4715.77 | 4717.15 |
| 64 | CGGC | C*GA | ACG* | AGGC |  | 4518.15 | 4513.68 |
| 65 | CGGC | G*GC | ACG* | AGGC |  | 4631.22 | 4625.62 |
| 66 | CGGC | T*GG | CGA* | AGGC |  | 4507.90 | 4508.31 |
| 67 | CGGC | C*CG | CGA* | AGGC |  | 4465.04 | 4461.58 |
| 68 | CGGC | G*CA | CGA* | AGGC |  | 4427.99 | 4429.91 |
| 69 | CGGC | C*GA | CGA* | AGGC |  | 4532.09 | 4545.66 |
| 70 | CGGC | G*GC | CGA* | AGGC |  | 4442.99 | 4439.18 |

|    |      |      |      |      |                                                                                      |                   |         |
|----|------|------|------|------|--------------------------------------------------------------------------------------|-------------------|---------|
| 71 | CGGC | T*GG | AGC* | AGGC | 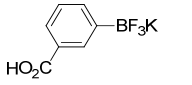   | 4641.81<br>(+TFA) | 4638.31 |
| 72 | CGGC | C*CG | AGC* | AGGC |    | 4494.84           | 4500.19 |
| 73 | CGGC | G*CA | AGC* | AGGC |    | 4414.94           | 4412.73 |
| 74 | CGGC | C*GA | AGC* | AGGC |    | 4442.99           | 4441.29 |
| 75 | CGGC | G*GC | AGC* | AGGC |    | 4458.98           | 4459.86 |
| 76 | AAGG | T*GG | GTG* | AGGC |    | 4591.08           | 4586.79 |
| 77 | AAGG | C*CG | GTG* | AGGC |    | 4530.04           | 4524.98 |
| 78 | AAGG | G*CA | GTG* | AGGC |    | 4632.94           | 4629.51 |
| 79 | AAGG | C*GA | GTG* | AGGC |    | 4582.06           | 4584.59 |
| 80 | AAGG | G*GC | GTG* | AGGC |    | 4594.94           | 4584.84 |
| 81 | AAGG | T*GG | GCA* | AGGC |  | 4754.37           | 4751.86 |
| 82 | AAGG | C*CG | GCA* | AGGC |  | 4608.17           | 4602.29 |
| 83 | AAGG | G*CA | GCA* | AGGC |  | 4677.35           | 4677.25 |
| 84 | AAGG | C*GA | GCA* | AGGC |  | 4624.11           | 4618.83 |
| 85 | AAGG | G*GC | GCA* | AGGC |  | 4682.58           | 4677.23 |
| 86 | AAGG | T*GG | ACG* | AGGC |  | 4490.25           | 4488.14 |
| 87 | AAGG | C*CG | ACG* | AGGC |  | 4461.99           | 4460.05 |
| 88 | AAGG | G*CA | ACG* | AGGC |  | 4678.04           | 4672.26 |

|     |      |      |      |      |                                                                                      |                  |         |
|-----|------|------|------|------|--------------------------------------------------------------------------------------|------------------|---------|
| 89  | AAGG | C*GA | ACG* | AGGC | 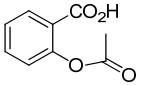   | 4513.02<br>(-Ac) | 4509.96 |
| 90  | AAGG | G*GC | ACG* | AGGC |    | 4771.31          | 4776.79 |
| 91  | AAGG | T*GG | CGA* | AGGC |    | 4601.32          | 4596.31 |
| 92  | AAGG | C*CG | CGA* | AGGC |    | 4574.38          | 4571.75 |
| 93  | AAGG | G*CA | CGA* | AGGC |    | 4570.38          | 4564.29 |
| 94  | AAGG | C*GA | CGA* | AGGC |    | 4625.64          | 4620.35 |
| 95  | AAGG | G*GC | CGA* | AGGC |    | 4617.57          | 4610.36 |
| 96  | AAGG | T*GG | AGC* | AGGC |  | 4747.16          | 4745.93 |
| 97  | AAGG | C*CG | AGC* | AGGC |  | 4606.16          | 4604.94 |
| 98  | AAGG | G*CA | AGC* | AGGC |  | 4733.32          | 4735.18 |
| 99  | AAGG | C*GA | AGC* | AGGC |  | 4519.11          | 4512.64 |
| 100 | AAGG | G*GC | AGC* | AGGC |  | 4724.50          | 4719.85 |
| 101 | GAAC | T*GG | GTG* | AGGC |  | 4648.34          | 4642.61 |
| 102 | GAAC | C*CG | GTG* | AGGC |  | 4645.50          | 4639.77 |

|     |      |      |      |      |                                                                                      |         |         |
|-----|------|------|------|------|--------------------------------------------------------------------------------------|---------|---------|
| 103 | GAAC | G*CA | GTG* | AGGC | 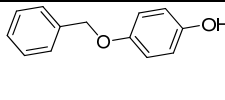   | 4610.39 | 4604.26 |
| 104 | GAAC | C*GA | GTG* | AGGC |    | 4604.39 | 4597.79 |
| 105 | GAAC | G*GC | GTG* | AGGC |    | 4597.30 | 4589.80 |
| 106 | GAAC | T*GG | GCA* | AGGC |    | 4600.17 | 4598.16 |
| 107 | GAAC | C*CG | GCA* | AGGC |    | 4512.08 | 4516.21 |
| 108 | GAAC | G*CA | GCA* | AGGC |    | 4658.23 | 4657.36 |
| 109 | GAAC | C*GA | GCA* | AGGC |    | 4679.20 | 4680.10 |
| 110 | GAAC | G*GC | GCA* | AGGC |   | 4687.23 | 4688.75 |
| 111 | GAAC | T*GG | ACG* | AGGC |  | 4633.43 | 4627.48 |
| 112 | GAAC | C*CG | ACG* | AGGC |  | 4561.16 | 4554.47 |
| 113 | GAAC | G*CA | ACG* | AGGC | $\text{Me}_2\text{N-SO}_2\text{Cl}$                                                  | 4460.04 | 4559.68 |
| 114 | GAAC | C*GA | ACG* | AGGC |  | 4473.08 | 4468.33 |
| 115 | GAAC | G*GC | ACG* | AGGC |  | 4489.08 | 4482.19 |
| 116 | GAAC | T*GG | CGA* | AGGC |  | 4549.07 | 4552.30 |
| 117 | GAAC | C*CG | CGA* | AGGC |  | 4494.07 | 4494.72 |
| 118 | GAAC | G*CA | CGA* | AGGC |  | 4507.10 | 4505.81 |
| 119 | GAAC | C*GA | CGA* | AGGC |  | 4550.12 | 4553.38 |



|     |      |      |      |      |                                                                                    |         |         |
|-----|------|------|------|------|------------------------------------------------------------------------------------|---------|---------|
| 120 | GAAC | G*GC | CGA* | AGGC | 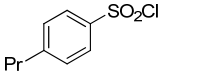 | 4551.15 | 4550.41 |
| 121 | GAAC | T*GG | AGC* | AGGC |  | 4524.07 | 4519.79 |
| 122 | GAAC | C*CG | AGC* | AGGC |  | 4483.09 | 4478.41 |
| 123 | GAAC | G*CA | AGC* | AGGC |  | 4519.11 | 4516.13 |
| 124 | GAAC | C*GA | AGC* | AGGC |  | 4499.12 | 4498.36 |
| 125 | GAAC | G*GC | AGC* | AGGC |  | 4552.07 | 4547.79 |
